# Supplementary material for: Use of Micellar Delivery Systems to Enhance Curcumin’s Stability and Microbial Photoinactivation Capacity
Source: MDPI journal article supplement (doi:10.3390/foods10081777), 2021-07-31
Supplement: s1 [file s1]

## Supplementary Material

### Use of micellar delivery to enhance curcumin's stability and microbial photoinactivation

Figure S1

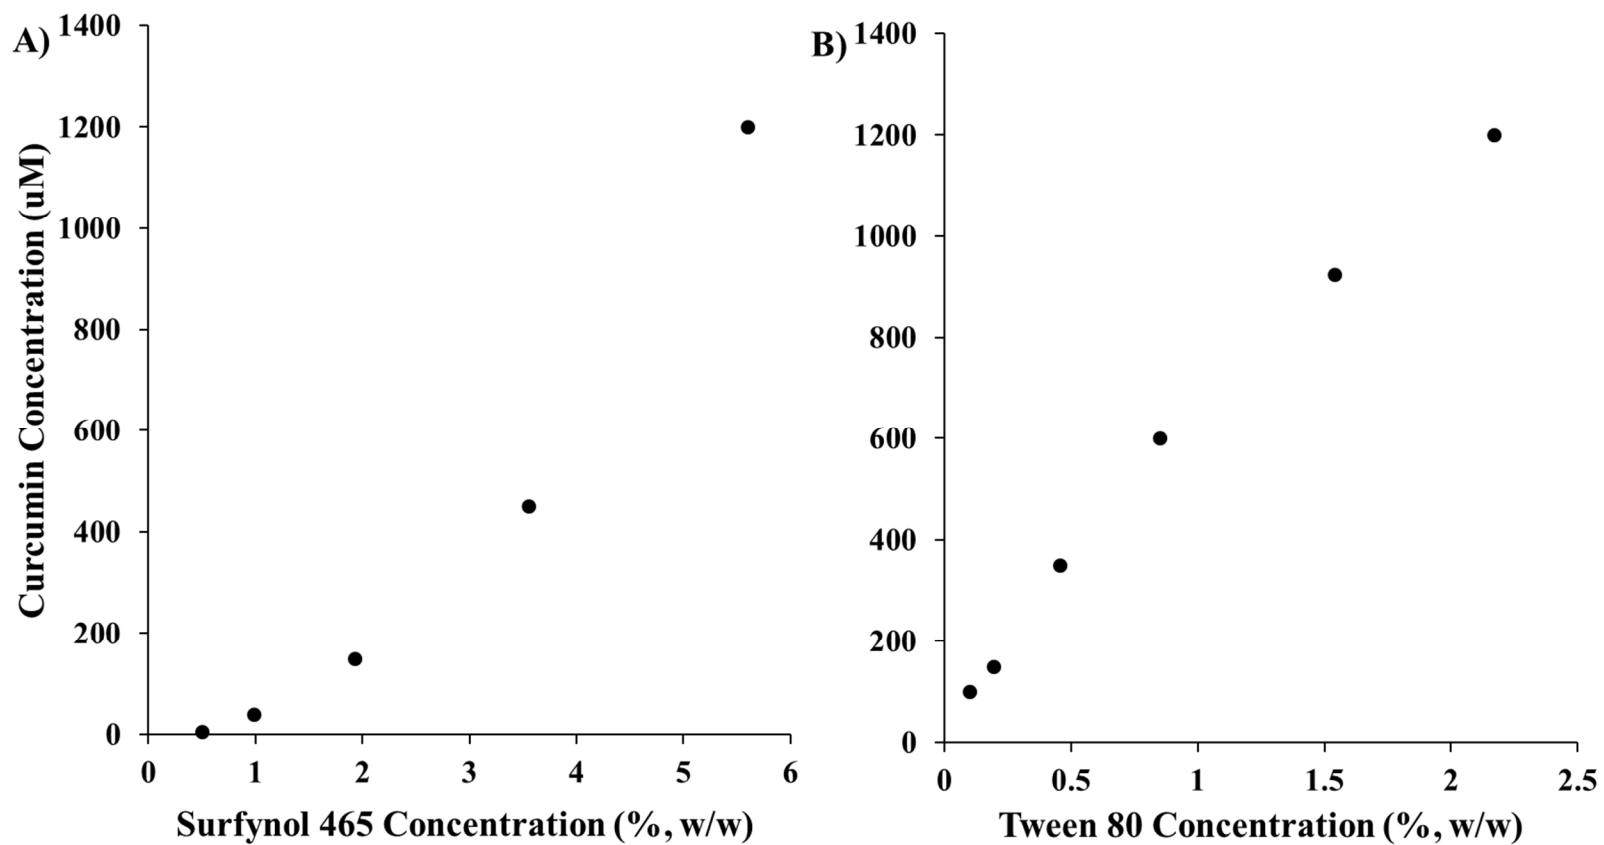

Figure S1. Loading capacity of A) Surfnol 465 and B) T80 solution with curcumin dissolved in ethanol.

Figure S2

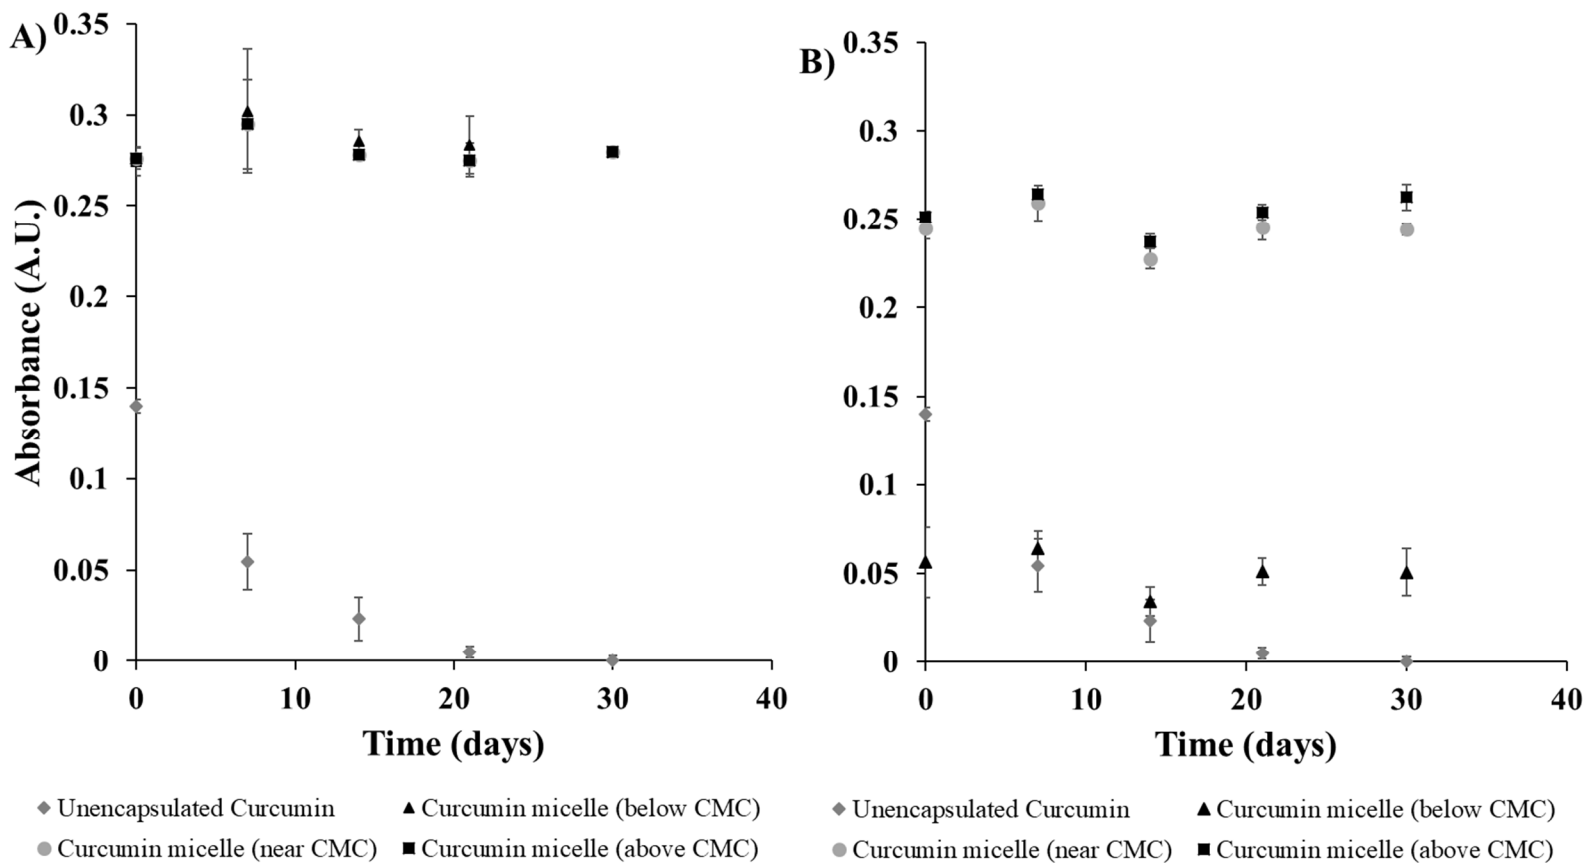

**Figure S2. Absorbance of curcumin in solution and encapsulated in A) Surfynol 465 and B) Tween 80 (T80) at different concentrations during storage at 4 °C for 30 days measured at  $\lambda = 425$  nm.**

Figure S3

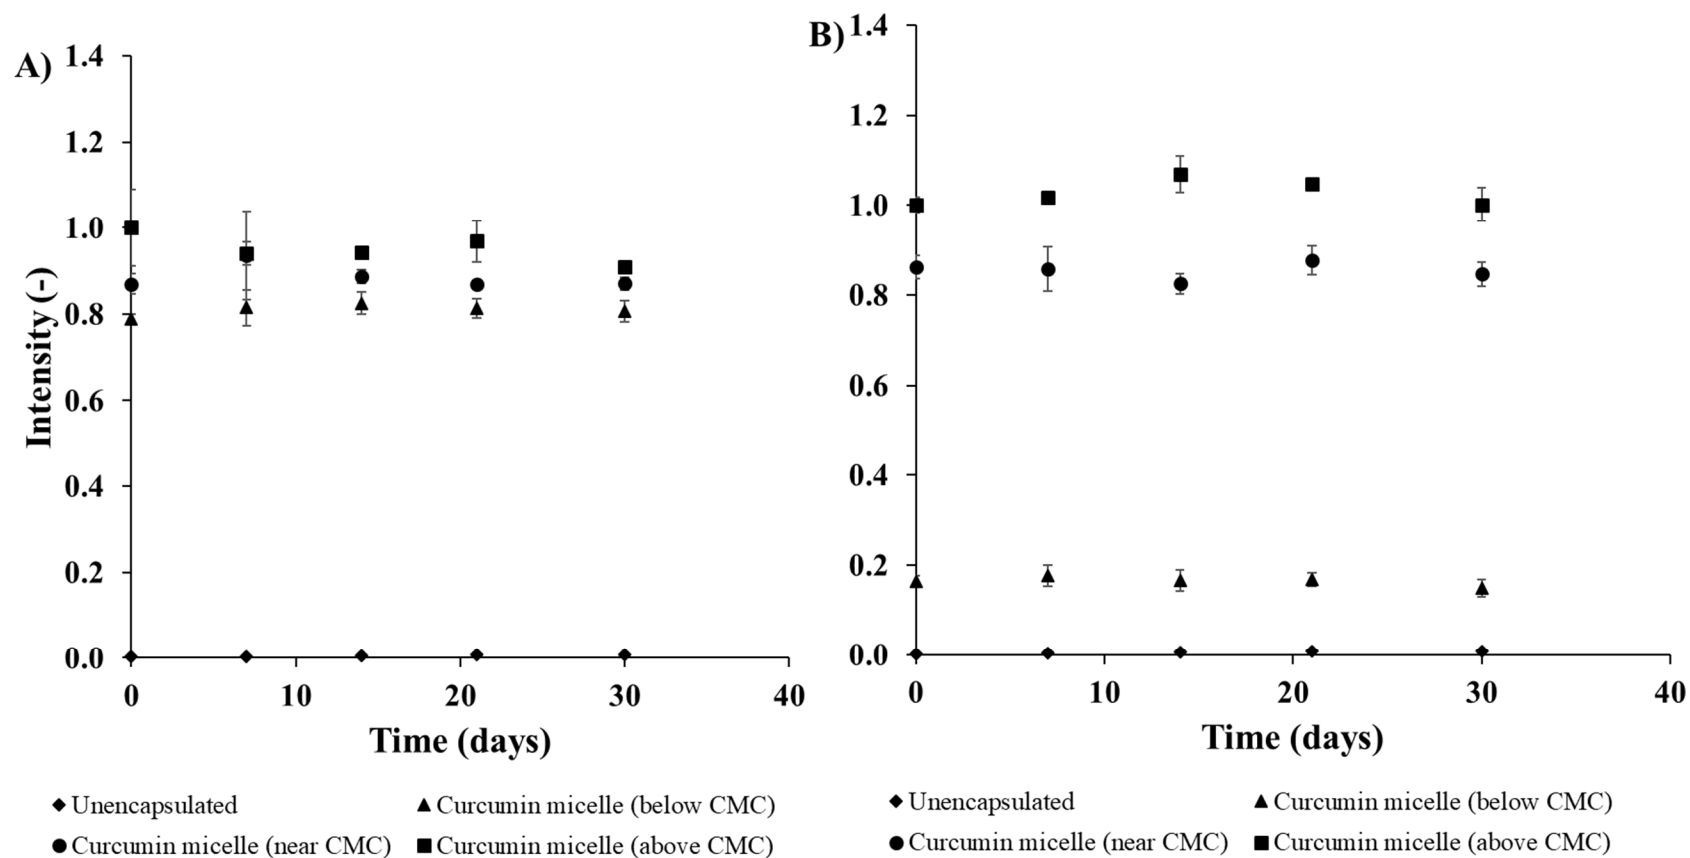

**Figure S3. Normalized fluorescence intensity of curcumin in solution and encapsulated in A) Surfynol 465 and B) T80 at different concentrations during storage at 4 °C for 30 days.**

**Figure S4**

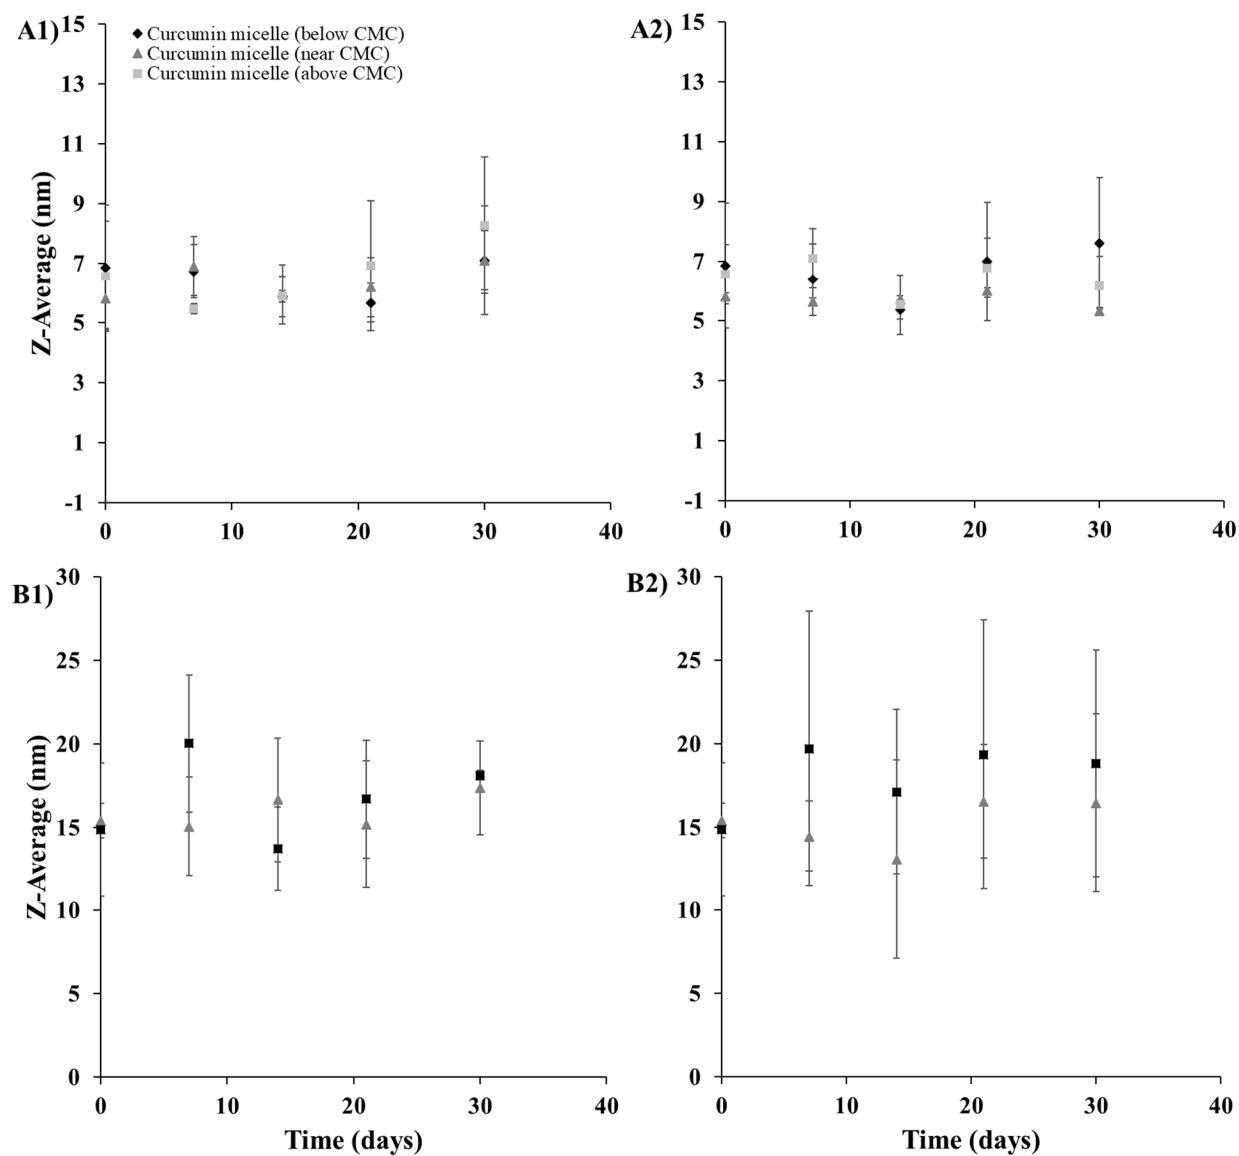

**Figure S4. Average diameter of stock curcumin micelles produced with A) Surfynol 465 and B) T80 over 30-day storage at 1) 20°C and 2) 4°C**

**Table S1. Zeta-potential of stock micelle solution containing different types and amounts of surfactants**

| Curcumin Micelle             |                 |                  | Mean Particle Diameter Z-average (nm) |                              |                              |                             |
|------------------------------|-----------------|------------------|---------------------------------------|------------------------------|------------------------------|-----------------------------|
|                              |                 |                  | 4°C                                   |                              | 20°C                         |                             |
| Curcumin Conc.<br>( $\mu$ M) | Surfactant Type | Surfactant Level | Day 0                                 | Day 30                       | Day 0                        | Day 30                      |
| 20                           | Surfynol 465    | Below CMC        | -0.3 $\pm$ 0.3 <sup>A2</sup>          | -0.4 $\pm$ 0.5 <sup>A</sup>  | -0.3 $\pm$ 0.3 <sup>A2</sup> | -0.3 $\pm$ 0.2 <sup>A</sup> |
|                              |                 | Near CMC         | -0.02 $\pm$ 0.9 <sup>A</sup>          | -0.2 $\pm$ 0.1 <sup>A</sup>  | -0.4 $\pm$ 0.7 <sup>A</sup>  | -0.3 $\pm$ 0.8 <sup>A</sup> |
|                              |                 | Above CMC        | -0.4 $\pm$ 0.2 <sup>A</sup>           | 0.003 $\pm$ 0.4 <sup>A</sup> | -0.4 $\pm$ 0.2 <sup>A</sup>  | -0.3 $\pm$ 0.3 <sup>A</sup> |
|                              | Tween 80        | Below CMC        | - <sup>1</sup>                        | -                            | -                            | -                           |
|                              |                 | Near CMC         | -1.3 $\pm$ 1.6 <sup>A</sup>           | -0.2 $\pm$ 0.4 <sup>B</sup>  | -1.3 $\pm$ 1.6 <sup>A</sup>  | -0.5 $\pm$ 1.8 <sup>A</sup> |
|                              |                 | Above CMC        | -0.2 $\pm$ 0.5 <sup>A</sup>           | -0.1 $\pm$ 0.05 <sup>A</sup> | -0.2 $\pm$ 0.5 <sup>A</sup>  | -0.1 $\pm$ 0.4 <sup>A</sup> |

<sup>1</sup> Samples too polydisperse to be measured with the Zetasizer NS due to the formation of curcumin crystals.

<sup>2</sup> Capital letters were used to show differences between measurements at day 0 and 30; same letters indicate data was not significantly different ( $p>.05$ )
